# Supplementary material for: Exogenous application of nitric oxide donors regulates short-term flooding stress in soybean
Source: PeerJ. 2019 Oct 8;7:e7741. doi: 10.7717/peerj.7741 (PMC6788439; doi:10.7717/peerj.7741)
Supplement: Supplemental Information 1 [file peerj-07-7741-s001.xlsx]

## Sheet: Sheet1
		SOA(3H)DAE								SOA(6H)DAE
		NF	121.025	122.065	120.256	D	121.115			NF	137.84	137.94	137.92	D	137.9
		CWF	265.53	268.02	265.085	A	266.212			CWF	223.618	224.612	225.367	B	224.532
		SNP	228.964	231.124	231.024	B	230.371			SNP	173.381	172.362	174.225	C	173.323
		CySNO	113.958	133.989	135.948	C	127.965			CySNO	234.861	235.234	238.308	A	236.134
		SOA(3H) PUNG
										SOA(6H) PUNG
		NF	67.024	66.344	67.423	C	66.9303			NF	78.52	78.35	79.92	C	78.93
		CWF	120.31	121.14	122.41	A	121.287			CWF	99.58	97.74	97.191	A	98.1703
		SNP	66.34	66.65	68.58	C	67.19			SNP	50.03	52.6	54.31	D	52.3133
		CySNO	101.03	101.17	104.08	B	102.093			CySNO	85.579	87.344	90.01	B	87.6443
										RED (6H) DAE
		RED (3H) DAE	1.28	1.22	1.36	1.28667				NF	1.5	1.51	1.56	1.52333
		NF	2.5	2.9	2.21	2.53667				CWF	3.87	3.71	4.19	3.92333
		CWF	2.05	2.66	1.81	2.17333				SNP	3.28	3.22	3.35	3.28333
		SNP	2.04	1.95	2.01	2				CySNO	2.93	2.9	3.04	2.95667
		CySNO
		red(3h) pung								red(6h) pung
		NF	2.2	2.6	1.85	2.21667	C			NF	2.5	2.44	2.33	2.42333
		CWF	3.16	3.33	3.21	3.23333	B			CWF	3.34	3.475	3.51	3.44167
		SNP	3.5	3.5	3.3	3.43333	B			SNP	3.1	3.2	2.95	3.08333
		CySNO	4.39	3.8	3.9	4.03	A			CySNO	3.62	3.8	4.8	4.07333
		ABA (3H), DAE								ABA (6H), DAE
		NF	324.54	331.54	318.45	324.843				NF	331.4	339.47	327.29	332.72
		CWF	458.37	453.48	437.47	449.773				CWF	542.66	536.87	549.33	542.953
		SNP	403.75	398.34	411.21	404.433				SNP	438.34	430.86	447.35	438.85
		CySNO	330.48	325.64	337.48	331.2				CySNO	425.63	431.67	419.36	425.553
		ABA (3H), PUNG								ABA (6H), PUNG
										NF	95.46	101.57	89.34	95.4567
		NF	93.58	90.76	96.75	93.6967				CWF	390.45	398.24	407.24	398.643
		CWF	278.64	284.68	289.36	284.227				SNP	341.73	334.28	349.38	341.797
		SNP	259.71	251.79	246.81	252.77				CySNO	339.7	348.39	328.91	339
		CySNO	243.78	238.64	249.63	244.017
		SNO 3H DAE								SNO 6H DAE
		NF	21.6	20..4	19.2	20.4				NF	21.1	22.1	20	21.0667
		CWF	8.7	8.35	9.07	8.70667				CWF	10.56	10.34	10.94	10.6133
		SNP	10.51	10.42	11.34	10.7567				SNP	6.589	8.355	8.045	7.663
		CySNO	15.98	16.34	17.54	16.62				CySNO	9.612	9.0211	10.541	9.7247
		SNO 3 Pung								SNO 6 Pung
		NF	8.2	9.4	7.8	8.46667				NF	8.1	9.4	10.3	9.26667
		CWF	27.68	26.94	31.99	28.87				CWF	30.97	34.86	32.27	32.7
		SNP	35.97	36.86	37.27	36.7				SNP	81.058	82.269	80.151	81.1593
		CySNO	42.37	43.15	44.54	43.3533				CySNO	53.289	55.694	55.871	54.9513
