# Supplementary material for: Exogenous application of nitric oxide donors regulates short-term flooding stress in soybean
Source: PeerJ. 2019 Oct 8;7:e7741. doi: 10.7717/peerj.7741 (PMC6788439; doi:10.7717/peerj.7741)
Supplement: Supplemental Information 2 [file peerj-07-7741-s002.xlsx]

## Sheet: Pungsanamul
	Treatment	ABA R2	ABA R2	avg			TOC1	TOC1	avg			GSNOR	GSNOR	avg			GINR	GINR	avg			NOX	NOX	avg
	cwf6	1.36264	1.82989	1.59626			1.04234	0.8154	0.92887			0.55542	0.965123	0.760271			2.09546	2.15443	2.12494			0.802437	0.454747	0.628592
	Cont6	0.0304089	0.0334679	0.0319384	cont6		13.0679	5.87897	9.47345	cont6		0.654272	0.469519	0.561895	cont6		0.0179043	0.130556	0.07423	cont6		0.342908	0.151595	0.247252	cont6
	SNP6	0.0186445	0.02052	0.0195823	snp6		10.8179	7.76649	9.29219	snp6		0.816405	0.585869	0.701137	snp6		0.0770799	0.562057	0.319568	snp6		0.786945	0.347898	0.567421	snp6
	CySNO6	0.0163862	0.0180345	0.0172103	cysno6		7.90399	3.55583	5.72991	cysno6		0.831918	0.597001	0.71446	cysno6		0.150792	1.09956	0.625174	cysno6		0.822553	0.36364	0.593097	cysno6
	CWF3	0.994236	1.09425	1.04424			0.64234	0.8154	0.72887			0.904401	0.828949	0.866675			2.31684	2.98118	2.64901			0.942481	0.460868	0.701674
	Cont3	0.908601	1	0.9543	cont3		2.22282	1	1.61141	cont3		1.39349	1	1.19675	cont3		0.137139	1	0.568569	cont3		2.262	1	1.631	cont3
	SNP3	0.84481	0.929792	0.887301	snp3		3.08777	1.38912	2.23844	snp3		2.08269	1.49458	1.78864	snp3		0.385077	2.80793	1.59651	snp3		2.97346	1.31453	2.14399	snp3
	CySNO3	0.429423	0.47262	0.451022	cysno3		3.38725	1.52385	2.45555	cysno3		1.80724	1.29692	1.55208	cysno3		0.133464	0.9732	0.553332	cysno3		1.62183	0.716991	1.16941	cysno3

## Sheet: Daewon
		ABAR2					TOC1		Avg			GINR		Avg			GSNOR		Avg				NOX
	Cwf3	1.36881	1.0486	1.2087			0.833677	0.470688	0.652182			1.2914	2.71965	2.00553			0.941592	1.12998	1.03578	cwf			CwF	0.4838	0.6958	0.5898								0.148917
	Cont3	0.614202	1	0.807101	cont		2.98421	2.74	2.86211	cont		0.474839	1	0.73742	cont		0.833283	1	0.916641	cont			Cont	3.2544	3.5168	3.3856								1.27762
	SNP3	0.408946	0.665817	0.537382	snp		3.15534	0.646029	1.90069	snp		0.137924	0.290465	0.214195	snp		0.795859	0.955089	0.875474	snp			Snp	1.57122	2.29547	1.93335
	CySNO3	0.60062	0.977886	0.789253	cysno		2.62496	0.537439	1.5812	cysno		0.454671	0.957527	0.706099	cysno		1.65359	1.98442	1.819	cysno			Cys No	2.1245	3.1324	2.62845								0.124394
																																		0.281853
	cwf6	1.03782	1.15502	1.09642			0.984056	0.521951	0.753004			0.570893	1.20229	0.88659	Cwf		1.17775	1.41339	1.29557	CWF			CwF	0.6543	0.5478	0.7584
	Cont6	0.179801	0.292738	0.23627	cont		4.25569	3.87131	4.0635			174.204	366.869	270.536	cont		1.09148	1.30986	1.20067	CONT			Cont	6.16196	5.23547	7.0423
	SNP6	0.0137232	0.0223431	0.0180332	snp		5.48352	1.1227	3.30311	snp		0.505824	1.06525	0.785538	snp		1.99079	2.38909	2.18994	SNP			Snp	0.471183	0.38878	0.5647
	CySNO6	0.109461	0.178217	0.143839	cysno		7.06514	1.44653	4.25583	cysno		1.042	2.19442	1.61821	cysno		1.01257	1.21516	1.11387	CySNO			Cys No	2.32359	2.1235	2.5221
